# Supplementary material for: Transcriptomics, chromosome engineering and mapping identify a restorer-of-fertility region in the CMS wheat system msH1
Source: Springer Nature journal article supplement (doi:10.1007/s00122-019-03457-3), 2019-10-17
Supplement: MOESM1 [file 122_2019_3457_MOESM1_ESM.pdf]

## Supplementary data

**Supplemental Table 1.** Number of reads obtained in each library Fert\_3, Fert\_5, Ster\_4 and Ster\_9. For each mapping strategy (BW: BarWheat; OB: OnlyBarley) and mapping conditions (MM: allowed mismatches from 0 to 3) the number of mapped reads and the number of reads with multiple alignments (Multi) are shown. Data were exported from Tophat stats files.

|                 |        | Libraries |          |          |          |
|-----------------|--------|-----------|----------|----------|----------|
|                 |        | Fert_3    | Fert_5   | Ster_4   | Ster_9   |
| Number of reads |        | 20144291  | 20433822 | 20140434 | 19381340 |
| Mapping         |        |           |          |          |          |
| BW_MM0          | Mapped | 14271051  | 14078678 | 14379682 | 13480950 |
|                 | Multi  | 2786416   | 2853642  | 2825898  | 2925489  |
| BW_MM1          | Mapped | 16912108  | 17077500 | 16965078 | 17724181 |
|                 | Multi  | 3199631   | 3301325  | 3240195  | 3381181  |
| BW_MM2          | Mapped | 17682475  | 17931663 | 17724181 | 17091978 |
|                 | Multi  | 3344058   | 3434207  | 3381181  | 3495523  |
| OB_MM0          | Mapped | 677590    | 752582   | 649914   | 728614   |
|                 | Multi  | 260884    | 344437   | 235056   | 290913   |
| OB_MM1          | Mapped | 1814250   | 1912827  | 1792817  | 1965722  |
|                 | Multi  | 446919    | 566307   | 416586   | 501660   |
| OB_MM2          | Mapped | 3244504   | 3336480  | 3233140  | 3520411  |
|                 | Multi  | 648841    | 776676   | 618557   | 721819   |
| OB_MM3          | Mapped | 4737897   | 4821695  | 4737841  | 5098053  |
|                 | Multi  | 889465    | 1012596  | 858243   | 966930   |

**Supplemental Table 5.** Primer pairs designed for specific amplification of *H. chilense* genes. For primer pair names, ‘HORVU’ form barley orthologue ID was changed for ‘Hc’ from *H. chilense*.

| Tagged gene   | Forward                   | Reverse                  |
|---------------|---------------------------|--------------------------|
| Hc6Hr1G001670 | AAAGGGCTACAAGACCCGTG      | GACACTGGTCAAGCACTTACA    |
| Hc6Hr1G002130 | GGGAGATTATCGTCCGCGTT      | CATCGACTTCGTCTACCGGG     |
| Hc6Hr1G002890 | AGTTGGCAGCACACCCATT       | GAAATGTTGGGTCGTGGCATC    |
| Hc6Hr1G003170 | TGACCTAGAAGGAAATGTCTGT    | TGTTACACGACGGTTCCAGA     |
| Hc6Hr1G003470 | ATGAACAGGTGGGTTGCTGT      | ACCAAGGATTTGCTAGCGGT     |
| Hc6Hr1G003770 | TTCTTGATGTGGTGGCAGGT      | GCAAGGTCTTTCTCAAGTAGTGC  |
| Hc6Hr1G003890 | ATGCATCCTTCTGGGCAACA      | TCGACCCCTCAGATCTTTAGCA   |
| Hc6Hr1G003900 | TTTGGCGCATTGTTACGTT       | CGAGGGTGTCTTTGTCCGAA     |
| Hc6Hr1G004120 | CCTACGTCCTCAACCACCTG      | GGTGATGGAGTCCCTGTCTG     |
| Hc6Hr1G004350 | CAGGCAATGATCTCCCCCAG      | GGATTGTAGCCCTGTCAGCA     |
| Hc6Hr1G005240 | CTAGCTGCCCTTTGCGAGAA      | GGTTGTTGTGGACATCACAAATCT |
| Hc6Hr1G005370 | AAGCTTGCTTTCTCTCCCCA      | GGGAAGATCAATGTTACTCCGC   |
| Hc6Hr1G005380 | AGAGGAACGTCGTCACATGG      | TACGTACCGTCCTATGATGCAA   |
| Hc6Hr1G005390 | TGGCTCAGTGCTAACTTGGT      | GTTCTGGGGGCAGCCT         |
| Hc6Hr1G005730 | GGAGCTGGCAAGCTTAAACG      | CGACTGTACATCCCCAAAGG     |
| Hc6Hr1G006050 | CTCACCATACTAGCCGATGAC     | GCAGGCGTACATGCAGTTTC     |
| Hc6Hr1G006560 | TGGCAGAAGAAAGCCTCTGG      | ATTGTCAACGAAGCCGCTAA     |
| Hc6Hr1G006880 | GAAACTCAAGGTGGGTCCACTCC   | TACATCGCGGCGTAAAACGA     |
| Hc6Hr1G007030 | ATGGGTGGCTGTAGTTGGC       | CCAAGGGACTGGTCAAGCAT     |
| Hc6Hr1G011020 | TTCGACTGGACGGAGCAAG       | ACATCCAGGGCATCACCAAG     |
| Hc0Hr1G014960 | G TTCATTCTCTCTGTTTGGTGGAC | GTGCTGGAACA ACTGACCTA    |
| Hc0Hr1G000390 | GGTTCGTCATGGAAATTTGAAACC  | TGCAAGATAAGGGACAGAGGATG  |

**Supplemental Table 6.** Preliminary characterization of the minichromosomes ( $H^{ch}mi1$  and  $H^{ch}mi2$ ) with molecular markers previously described for the acrocentric chromosome ( $H^{ch}ac$ ).

| Markers | chr | H1 | T21 | T26 | $H^{ch}ac$ | $H^{ch}ac$ | $H^{ch}mi2$ | $H^{ch}mi1$ |
|---------|-----|----|-----|-----|------------|------------|-------------|-------------|
|         |     |    |     |     | T749       | T528       | T854        | T527        |
| Bmac316 | 6H  | +  | -   | -   | +          | +          | +           | +           |
| K03302  | 6H  | +  | -   | -   | +          | +          | +           | -           |
| MGW620  | 6H  | +  | -   | -   | +          | +          | +           | -           |
| Bawu343 | 1H  | +  | -   | -   | +          | +          | -           | -           |
| K00856  | 1H  | +  | -   | -   | +          | +          | -           | -           |
| Bawu842 | 1H  | +  | -   | -   | +          | +          | -           | -           |
| K08237  | 1H  | +  | -   | -   | +          | +          | -           | -           |
